# Supplementary material for: Removal of metals and inorganics from rendered fat using polyamine-modified cellulose nanocrystals
Source: Royal Society of Chemistry journal article supplement (doi:10.1039/d3su00116d), 2023-01-01
Supplement: d3su00116d1.pdf [file d3su00116d1.pdf]

*Supplementary information for*

**Removal of metals and inorganics from rendered fat using polyamine-  
modified cellulose nanocrystals**

Outline

---

Table SI 1: Results obtained from real samples after water wash and CNC-PEI treatment. Control samples remained untreated and were analyzed in order to compare samples before and after removal.

Figure SI 1. Optimization of the extraction temperature. Sample volume 10 mL, 5 minutes water wash, 10 minutes sorbent extraction, 2 minutes 9000 rpm centrifugation.

Figure SI 2. Extraction rates as a function of time. All the analytes were fitted using a pseudo-second-order kinetics. The response of all the extracted species showed similar behaviors.

Table SI 2: Summary of removal of various contaminants from fat using other extraction materials or techniques. n/d: not discussed, \*does not mention removal of ionic species (specifically targeted by the application described in this report)

**Table SI 1:** Results obtained from real samples after water wash and CNC-PEI treatment. CKN - chicken fat, T - beef tallow, WG - white grease. Control samples remained untreated and were analyzed to compare samples before and after removal.

| Sample | Source |           | Na     | K      | Ca    | Mg    | Fe    | P      | S      | Total (ppm) | Average Removal |
|--------|--------|-----------|--------|--------|-------|-------|-------|--------|--------|-------------|-----------------|
| 1      | CKN    | Control   | 11.25  | 30.04  | 5.52  | 0.86  | 0.20  | 42.84  | 5.25   | 95.97       | 96.4%           |
|        |        | CNC-PEI   | 1.87   | 0.91   | 0.53  | 0.03  | 0.02  | 0.02   | 0.08   | 3.45        |                 |
|        |        | Reduction | 83.4%  | 99.8%  | 90.5% | 96.4% | 91.9% | 100.0% | 98.5%  |             |                 |
| 2      | CKN    | Control   | 92.51  | 20.65  | 29.39 | 2.56  | 1.98  | 20.10  | 1.94   | 169.12      | 91.9%           |
|        |        | CNC-PEI   | 8.13   | 1.30   | 3.03  | 0.06  | 0.04  | 0.88   | 0.24   | 13.68       |                 |
|        |        | Reduction | 91.2%  | 98.9%  | 89.7% | 97.5% | 98.1% | 97.6%  | 87.5%  |             |                 |
| 3      | CKN    | Control   | 27.41  | 28.17  | 20.55 | 3.14  | 0.17  | 56.85  | 4.53   | 140.81      | 97.5%           |
|        |        | CNC-PEI   | 1.14   | 0.54   | 0.70  | 0.20  | 0.01  | 0.98   | 0.01   | 3.59        |                 |
|        |        | Reduction | 95.8%  | 99.9%  | 96.6% | 99.5% | 93.5% | 100.0% | 100.0% |             |                 |
| 4      | CKN    | Control   | 78.33  | 28.80  | 64.96 | 4.93  | 0.35  | 73.59  | 4.93   | 255.89      | 97.7%           |
|        |        | CNC-PEI   | 1.12   | 0.06   | 4.51  | 0.07  | 0.02  | 0.08   | 0.08   | 5.94        |                 |
|        |        | Reduction | 98.6%  | 99.8%  | 93.1% | 98.6% | 95.3% | 99.9%  | 98.4%  |             |                 |
| 5      | CKN    | Control   | 90.60  | 32.34  | 33.61 | 4.02  | 0.31  | 70.47  | 5.09   | 236.45      | 95.7%           |
|        |        | CNC-PEI   | 4.75   | 0.12   | 5.23  | 0.11  | 0.01  | 0.01   | 0.00   | 10.22       |                 |
|        |        | Reduction | 94.8%  | 99.6%  | 84.4% | 97.2% | 96.5% | 100.0% | 100.0% |             |                 |
| 6      | CKN    | Control   | 89.18  | 24.61  | 9.59  | 1.17  | 0.30  | 24.58  | 3.23   | 152.67      | 92.2%           |
|        |        | CNC-PEI   | 11.59  | 0.01   | 0.10  | 0.01  | 0.02  | 0.10   | 0.08   | 11.90       |                 |
|        |        | Reduction | 87.0%  | 100.0% | 99.0% | 99.3% | 94.4% | 100.0% | 97.5%  |             |                 |
| 7      | CKN    | Control   | 76.52  | 22.42  | 5.57  | 0.76  | 0.21  | 23.38  | 2.67   | 131.54      | 91.3%           |
|        |        | CNC-PEI   | 10.00  | 0.02   | 0.09  | 0.01  | 0.02  | 1.21   | 0.08   | 11.43       |                 |
|        |        | Reduction | 86.9%  | 99.9%  | 98.3% | 98.6% | 92.3% | 100.0% | 97.0%  |             |                 |
| 8      | CKN    | Control   | 143.74 | 59.73  | 34.12 | 4.01  | 0.29  | 115.87 | 11.56  | 369.32      | 92.7%           |
|        |        | CNC-PEI   | 24.79  | 0.04   | 0.08  | 0.01  | 0.01  | 2.13   | 0.08   | 27.14       |                 |
|        |        | Reduction | 82.8%  | 99.9%  | 99.8% | 99.9% | 98.1% | 100.0% | 99.3%  |             |                 |
| 9      | CKN    | Control   | 34.29  | 52.68  | 33.58 | 3.44  | 0.26  | 104.10 | 10.43  | 238.77      | 98.3%           |
|        |        | CNC-PEI   | 1.80   | 0.01   | 0.81  | 0.01  | 0.01  | 1.35   | 0.08   | 4.07        |                 |
|        |        | Reduction | 94.8%  | 100.0% | 97.6% | 99.7% | 95.7% | 100.0% | 99.2%  |             |                 |
| 10     | CKN    | Control   | 63.35  | 60.61  | 34.38 | 4.07  | 0.29  | 116.51 | 11.64  | 290.87      | 95.1%           |
|        |        | CNC-PEI   | 10.43  | 1.60   | 0.06  | 0.01  | 0.01  | 1.97   | 0.09   | 14.17       |                 |
|        |        | Reduction | 83.5%  | 97.4%  | 99.8% | 99.8% | 96.6% | 98.3%  | 99.2%  |             |                 |
| 11     | CKN    | Control   | 29.48  | 43.78  | 30.16 | 4.79  | 0.45  | 83.12  | 9.86   | 201.64      | 97.4%           |
|        |        | CNC-PEI   | 5.01   | 0.07   | 0.15  | 0.01  | 0.01  | 0.08   | 0.00   | 5.32        |                 |
|        |        | Reduction | 83.0%  | 99.8%  | 99.5% | 99.9% | 97.5% | 99.9%  | 100.0% |             |                 |
| 12     | CKN    | Control   | 32.37  | 44.50  | 22.58 | 3.32  | 0.27  | 83.12  | 9.70   | 195.86      | 95.4%           |
|        |        | CNC-PEI   | 4.63   | 0.82   | 0.33  | 0.91  | 0.01  | 1.35   | 1.02   | 9.07        |                 |
|        |        | Reduction | 85.7%  | 98.2%  | 98.5% | 72.6% | 96.3% | 98.4%  | 89.5%  |             |                 |
| 13     | CKN    | Control   | 19.01  | 41.76  | 23.62 | 3.79  | 0.26  | 82.32  | 10.35  | 181.10      | 98.4%           |
|        |        | CNC-PEI   | 2.30   | 0.15   | 0.09  | 0.02  | 0.01  | 0.08   | 0.18   | 2.83        |                 |

|    |     |           |        |        |        |       |       |        |        |        |       |
|----|-----|-----------|--------|--------|--------|-------|-------|--------|--------|--------|-------|
|    |     | Reduction | 97.5%  | 99.6%  | 99.6%  | 99.4% | 95.7% | 99.9%  | 100.0% |        |       |
| 14 | CKN | Control   | 124.94 | 42.57  | 36.65  | 3.83  | 0.35  | 63.82  | 8.97   | 281.13 | 95.9% |
|    |     | CNC-PEI   | 11.22  | 0.04   | 0.06   | 0.01  | 0.01  | 0.08   | 0.08   | 11.49  |       |
|    |     | Reduction | 91.0%  | 99.9%  | 99.8%  | 99.9% | 96.8% | 99.9%  | 99.1%  |        |       |
| 15 | CKN | Control   | 35.89  | 23.20  | 13.01  | 2.05  | 0.30  | 39.40  | 5.42   | 119.27 | 94.7% |
|    |     | CNC-PEI   | 5.79   | 0.19   | 0.09   | 0.01  | 0.02  | 0.08   | 0.11   | 6.29   |       |
|    |     | Reduction | 83.9%  | 99.2%  | 99.3%  | 99.6% | 94.5% | 99.8%  | 100.0% |        |       |
| 16 | CKN | Control   | 102.83 | 44.11  | 34.44  | 3.77  | 0.42  | 66.78  | 9.38   | 261.74 | 95.7% |
|    |     | CNC-PEI   | 10.95  | 0.13   | 0.05   | 0.00  | 0.01  | 0.00   | 0.08   | 11.23  |       |
|    |     | Reduction | 89.4%  | 99.7%  | 99.8%  | 99.9% | 97.4% | 100.0% | 99.1%  |        |       |
| 17 | CKN | Control   | 125.11 | 50.95  | 32.34  | 5.16  | 0.42  | 77.99  | 11.16  | 303.13 | 95.5% |
|    |     | CNC-PEI   | 11.86  | 0.51   | 0.05   | 0.00  | 0.01  | 1.20   | 0.00   | 13.63  |       |
|    |     | Reduction | 90.5%  | 99.0%  | 99.8%  | 99.9% | 98.7% | 98.5%  | 100.0% |        |       |
| 18 | CKN | Control   | 116.87 | 36.15  | 27.54  | 3.85  | 0.44  | 62.22  | 8.00   | 255.07 | 95.4% |
|    |     | CNC-PEI   | 11.23  | 0.26   | 0.08   | 0.01  | 0.01  | 0.08   | 0.00   | 11.66  |       |
|    |     | Reduction | 90.4%  | 99.3%  | 99.7%  | 99.8% | 98.7% | 99.9%  | 100.0% |        |       |
| 19 | CKN | Control   | 101.68 | 32.23  | 19.23  | 2.41  | 0.29  | 53.57  | 6.55   | 215.97 | 95.6% |
|    |     | CNC-PEI   | 9.13   | 0.20   | 0.06   | 0.00  | 0.01  | 0.08   | 0.08   | 9.56   |       |
|    |     | Reduction | 91.0%  | 99.4%  | 99.7%  | 99.8% | 96.2% | 99.9%  | 98.8%  |        |       |
| 20 | CKN | Control   | 102.84 | 37.57  | 22.81  | 3.33  | 0.25  | 64.06  | 7.76   | 238.63 | 96.0% |
|    |     | CNC-PEI   | 8.92   | 0.30   | 0.04   | 0.03  | 0.01  | 0.08   | 0.08   | 9.45   |       |
|    |     | Reduction | 91.3%  | 99.2%  | 99.8%  | 99.9% | 95.7% | 99.9%  | 99.0%  |        |       |
| 21 | T   | Control   | 79.37  | 8.71   | 14.31  | 1.89  | 0.65  | 14.97  | 1.46   | 121.34 | 92.2% |
|    |     | CNC-PEI   | 9.00   | 0.25   | 0.09   | 0.01  | 0.01  | 0.08   | 0.08   | 9.53   |       |
|    |     | Reduction | 88.7%  | 97.1%  | 99.4%  | 99.5% | 98.3% | 99.5%  | 94.4%  |        |       |
| 22 | T   | Control   | 356.65 | 174.24 | 36.06  | 5.54  | 8.85  | 22.58  | 7.28   | 611.20 | 95.9% |
|    |     | CNC-PEI   | 23.15  | 0.71   | 0.40   | 0.05  | 0.08  | 0.16   | 0.24   | 24.80  |       |
|    |     | Reduction | 93.5%  | 99.6%  | 98.9%  | 99.1% | 99.1% | 99.3%  | 96.7%  |        |       |
| 23 | T   | Control   | 820.94 | 18.04  | 82.98  | 5.14  | 7.07  | 44.28  | 3.07   | 981.52 | 97.5% |
|    |     | CNC-PEI   | 23.15  | 0.71   | 0.40   | 0.05  | 0.08  | 0.16   | 0.24   | 24.80  |       |
|    |     | Reduction | 97.2%  | 96.1%  | 99.5%  | 99.0% | 98.9% | 99.6%  | 92.1%  |        |       |
| 24 | T   | Control   | 326.02 | 179.23 | 3.63   | 4.18  | 7.55  | 8.73   | 4.93   | 534.27 | 94.4% |
|    |     | CNC-PEI   | 19.84  | 6.76   | 2.10   | 0.37  | 0.53  | 0.08   | 0.49   | 30.16  |       |
|    |     | Reduction | 93.9%  | 96.2%  | 42.1%  | 91.2% | 92.9% | 99.1%  | 90.2%  |        |       |
| 25 | WG  | Control   | 152.69 | 15.56  | 64.84  | 5.05  | 0.85  | 36.27  | 1.78   | 277.04 | 93.6% |
|    |     | CNC-PEI   | 16.69  | 0.73   | 0.13   | 0.02  | 0.01  | 0.08   | 0.16   | 17.81  |       |
|    |     | Reduction | 89.1%  | 95.3%  | 99.8%  | 99.7% | 98.7% | 99.8%  | 90.9%  |        |       |
| 26 | WG  | Control   | 64.53  | 19.23  | 60.57  | 4.30  | 1.01  | 35.55  | 3.15   | 188.35 | 94.5% |
|    |     | CNC-PEI   | 6.64   | 1.02   | 1.01   | 0.15  | 0.04  | 0.85   | 0.65   | 10.37  |       |
|    |     | Reduction | 89.7%  | 94.7%  | 98.3%  | 96.4% | 95.6% | 100.0% | 79.5%  |        |       |
| 27 | WG  | Control   | 65.78  | 61.64  | 272.75 | 18.00 | 4.08  | 149.90 | 8.97   | 581.12 | 97.2% |
|    |     | CNC-PEI   | 8.40   | 1.86   | 2.67   | 0.25  | 0.07  | 0.64   | 2.59   | 16.48  |       |
|    |     | Reduction | 87.2%  | 97.0%  | 99.0%  | 98.6% | 98.4% | 99.6%  | 71.2%  |        |       |
| 28 | T   | Control   | 65.12  | 64.81  | 180.50 | 15.21 | 8.68  | 133.09 | 9.22   | 476.62 | 95.2% |

|  |           |       |       |       |       |       |       |       |       |  |
|--|-----------|-------|-------|-------|-------|-------|-------|-------|-------|--|
|  | CNC-PEI   | 3.51  | 4.16  | 7.47  | 0.99  | 0.56  | 5.30  | 0.97  | 22.97 |  |
|  | Reduction | 94.6% | 93.6% | 95.9% | 93.5% | 93.5% | 96.0% | 89.5% |       |  |

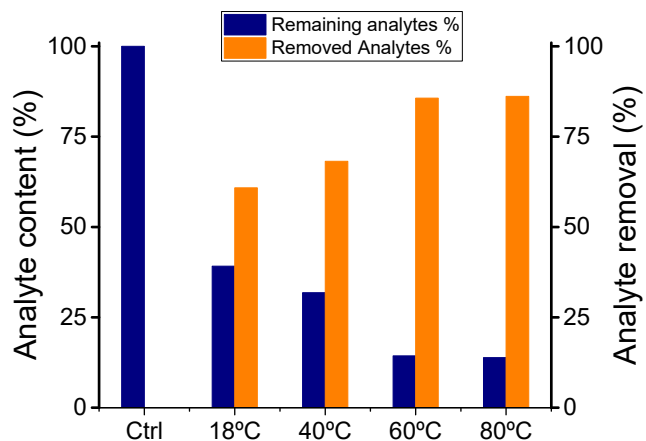

Figure SI 1. Optimization of the extraction temperature. Sample volume 10 mL, 5 minutes water wash, 300 mg CNC-PEI, 10 minutes sorbent extraction, 2 minutes 9000 rpm centrifugation.

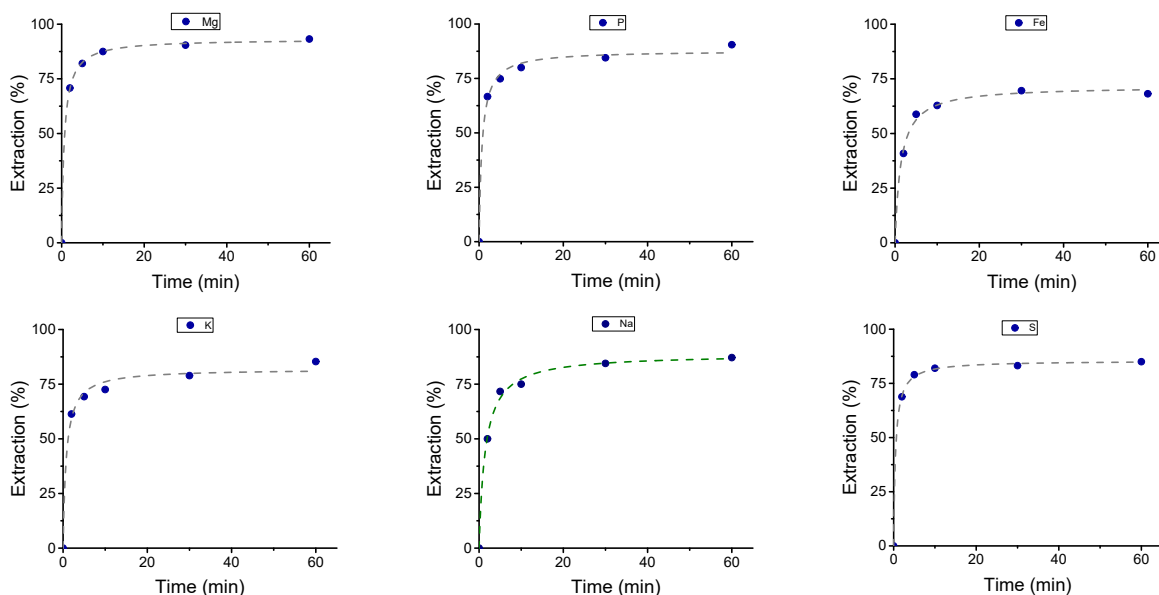

Figure SI 2. Extraction rates as a function of time. All the analytes were fitted using a pseudo-second-order kinetics. The response of all the extracted species showed similar behaviors.

**Table SI 2:** Summary of removal of various contaminants from fat using other extraction materials or techniques. n/d: not discussed, \*does not mention removal of ionic species (specifically targeted by the

application described in this report)

| Source                               | Notes                                                             | Relevant contaminant                                                           | Efficiency                       | Ref. |
|--------------------------------------|-------------------------------------------------------------------|--------------------------------------------------------------------------------|----------------------------------|------|
| Waste animal fats                    | Review*                                                           | Various                                                                        |                                  | 1    |
| Waste animal fats                    | Deep Eutectic Solvent*                                            | Glycerol                                                                       | > 95%                            | 2    |
| Biodiesel                            | Rinse w/H <sub>2</sub> SO <sub>4</sub> or p-toluene sulfonic acid | Fatty acids                                                                    | n/d                              | 3    |
| Rendered pork                        | H <sub>2</sub> SO <sub>4</sub> wash*                              | Fatty acids                                                                    | 83%                              | 4    |
| Sunflower oil                        | Na <sub>2</sub> CO <sub>3</sub> / H <sub>2</sub> O wash           | Ca and Na                                                                      | > 95%                            | 5    |
|                                      |                                                                   | Fatty acids                                                                    | < 96%                            |      |
| Highly-degraded base fat             | Vacuum distillation                                               | Ca, Mg, Na                                                                     | > 99%                            | 6    |
|                                      |                                                                   | K                                                                              | 90%                              |      |
|                                      |                                                                   | Ca                                                                             | 50 – 90%                         |      |
| Crude biodiesel                      | Review                                                            | Na and K                                                                       | n/d                              | 7    |
|                                      |                                                                   |                                                                                | n/d                              |      |
| Biodiesel from waste animal fats     | Neutralization/water wash/dry                                     | Na and K                                                                       | (only final values reported)     | 8    |
|                                      | Cationic resins                                                   |                                                                                |                                  |      |
| Vegetable and motor Oils             | Deep Eutectic Solvent Extraction                                  | Ag, Al, B, Ba, Ca, Co, Cr, Cu, Fe, K, Mg, Mn, Mo, Na, Ni, Pb, Sn, Ti, V and Zn | 35 – 99%                         | 9    |
| Aqueous food industry waste          | Soybean oil residues used as adsorbents                           | Cd, Zn and Pb                                                                  | 30 – 90%                         | 10   |
| Spiked Soybean Oil                   | Hollow fiber membrane                                             | Cu, Fe, Mn                                                                     | 95%                              | 11   |
|                                      |                                                                   |                                                                                |                                  |      |
| Waste animal fats, waste cooking oil | Bentonite adsorbents                                              | Na, K, Ca, Mg, P, B, Fe                                                        | 80 – 93%                         | 12   |
|                                      | Deep Eutectic Solvents                                            |                                                                                |                                  |      |
| Vegetable oils and animal fats       | Acid treatment/Clay                                               | P, Na, K, Ca, Mg, Cu, ZN, Mn and Fe                                            | >98% (from 50-800 ppm to < 1ppm) | 13   |

## References

---

1. I. B. Banković-Ilić, I. J. Stojković, O. S. Stamenković, V. B. Veljković and Y.-T. Hung, *Renew. Sust. Energ. Rev.*, 2014, **32**, 238-254.
2. A. Sander, M. Antonije Koščak, D. Kosir, N. Milosavljević, J. Parlov Vuković and L. Magić, *Renew. Energy*, 2018, **118**, 752-760.
3. F. Toldrá-Reig, L. Mora and F. Toldrá, *Appl. Sci.*, 2020, **10**.
4. A. C. Gumahin, J. M. Galamiton, M. J. Allerite, R. S. Valmorida, J.-R. L. Laranang, V. I. F. Mabayo, R. O. Arazo and A. L. Ido, *Bioresour. Bioprocess*, 2019, **6**, 48.
5. A. C. Alba-Rubio, M. L. Alonso Castillo, M. C. G. Albuquerque, R. Mariscal, C. L. Cavalcante and M. López Granados, *Fuel*, 2012, **95**, 464-470.
6. M. Ndiaye, A. Arhaliass, J. Legrand, G. Roelens and A. Kerihuel, *Renew. Energy*, 2020, **145**, 1073-1079.
7. V. B. Veljković, I. B. Banković-Ilić and O. S. Stamenković, *Renew. Sust. Energ. Rev.*, 2015, **49**, 500-516.
8. T. M. Mata, N. Cardoso, M. Ornelas, S. Neves and N. S. Caetano, *Energy Fuels*, 2011, **25**, 4756-4762.
9. A. Shishov, S. Savinov, N. Volodina, I. Gurev and A. Bulatov, *Microchem. J.*, 2022, **179**, 107456.
10. T. Mahmudiono, D. Bokov, G. Widjaj, A. S. Konstantinov, K. Setiyawan, W. K. Abdelbasset, H. S. Majdi, M. M. Kadhim, H. A. Kareem and K. Bansal, *Food Sci. Technol.*, 2022, **42**, e111721.
11. J. T. F. Keurentjes, T. G. J. Bosklopper, L. J. van Dorp and K. van't Riet, *J Am Oil Chem Soc*, 1990, **67**, 28-32.
12. A. Petračić, A. Sander and M. Cvetnić, *Sep. Sci. Technol.*, 2020, **55**, 3487-3501.
13. S. Kumar, R. B. Kumar, A. Sharma, B. Kumar, S. Semwal, A. K. Arora, S. K. Puri, S. Ahmed, V. Kagdiyal, S. Rajagopal, R. K. Malhotra and A. Kumar, *Process for removal of metals from oils/fats*, *Patent*: EP2591081A1, 2011.
